**Supplemental Table 3.**Logistic Regression and Prediction Rule for National Physical Therapy Examination (NPTE) Performance, Program C<sup>a</sup>

| Predictor                                                              | $\beta$                               | SE $\beta$ | Wald $\chi^2$                            | df | P    | Odds Ratio <sup>b</sup> (95% CI) |
|------------------------------------------------------------------------|---------------------------------------|------------|------------------------------------------|----|------|----------------------------------|
| vGRE 400 or less                                                       | 1.061                                 | 0.397      | 7.138                                    | 1  | .010 | 2.891 (1.327–6.289)              |
| qGRE 510 or less                                                       | 0.860                                 | 0.423      | 4.123                                    | 1  | .042 | 2.362 (1.030–5.415)              |
| Constant                                                               | –2.133                                | 0.316      | 45.561                                   | 1  |      |                                  |
| Test                                                                   |                                       |            | $\chi^2$                                 | df | P    |                                  |
| Overall model fit                                                      |                                       |            |                                          |    |      |                                  |
| Likelihood ratio test                                                  |                                       |            | 14.906                                   | 3  | .002 |                                  |
| Goodness-of-fit tests                                                  |                                       |            |                                          |    |      |                                  |
| Hosmer and Lemeshow                                                    |                                       |            | 0.081                                    | 3  | .994 |                                  |
| Nagelkerke $r^2$                                                       | 0.109                                 |            |                                          |    |      |                                  |
| Prediction Rule                                                        |                                       |            |                                          |    |      |                                  |
| +1.0 point for vGRE of 400 or less, +1.0 point for qGRE of 510 or less |                                       |            |                                          |    |      |                                  |
| Score                                                                  | Passed First Time Percentage (95% CI) |            | Failed at Least Once Percentage (95% CI) |    |      |                                  |
| 0                                                                      | 85.9 (80.2–90.9)                      |            | 14.1 (8.4–19.8)                          |    |      |                                  |
| 1.0 or 2.0                                                             | 66.7 (55.3–78.1)                      |            | 33.3 (22.0–44.7)                         |    |      |                                  |

<sup>a</sup> Sample size not reported to maintain anonymity of the program. SE=standard error, CI=confidence interval, vGRE=verbal Graduate Record Examination score, qGRE=quantitative Graduate Record Examination score.

<sup>b</sup> Adjusted for NPTE version.
